# Supplementary material
Source: PubMed Central journal article supplement (PMC2516231)
Supplement: 0801525105_0801525105SI.pdf [file 0801525105_0801525105SI.pdf]

# Supporting Information

Dym et al. 10.1073/pnas.0801525105

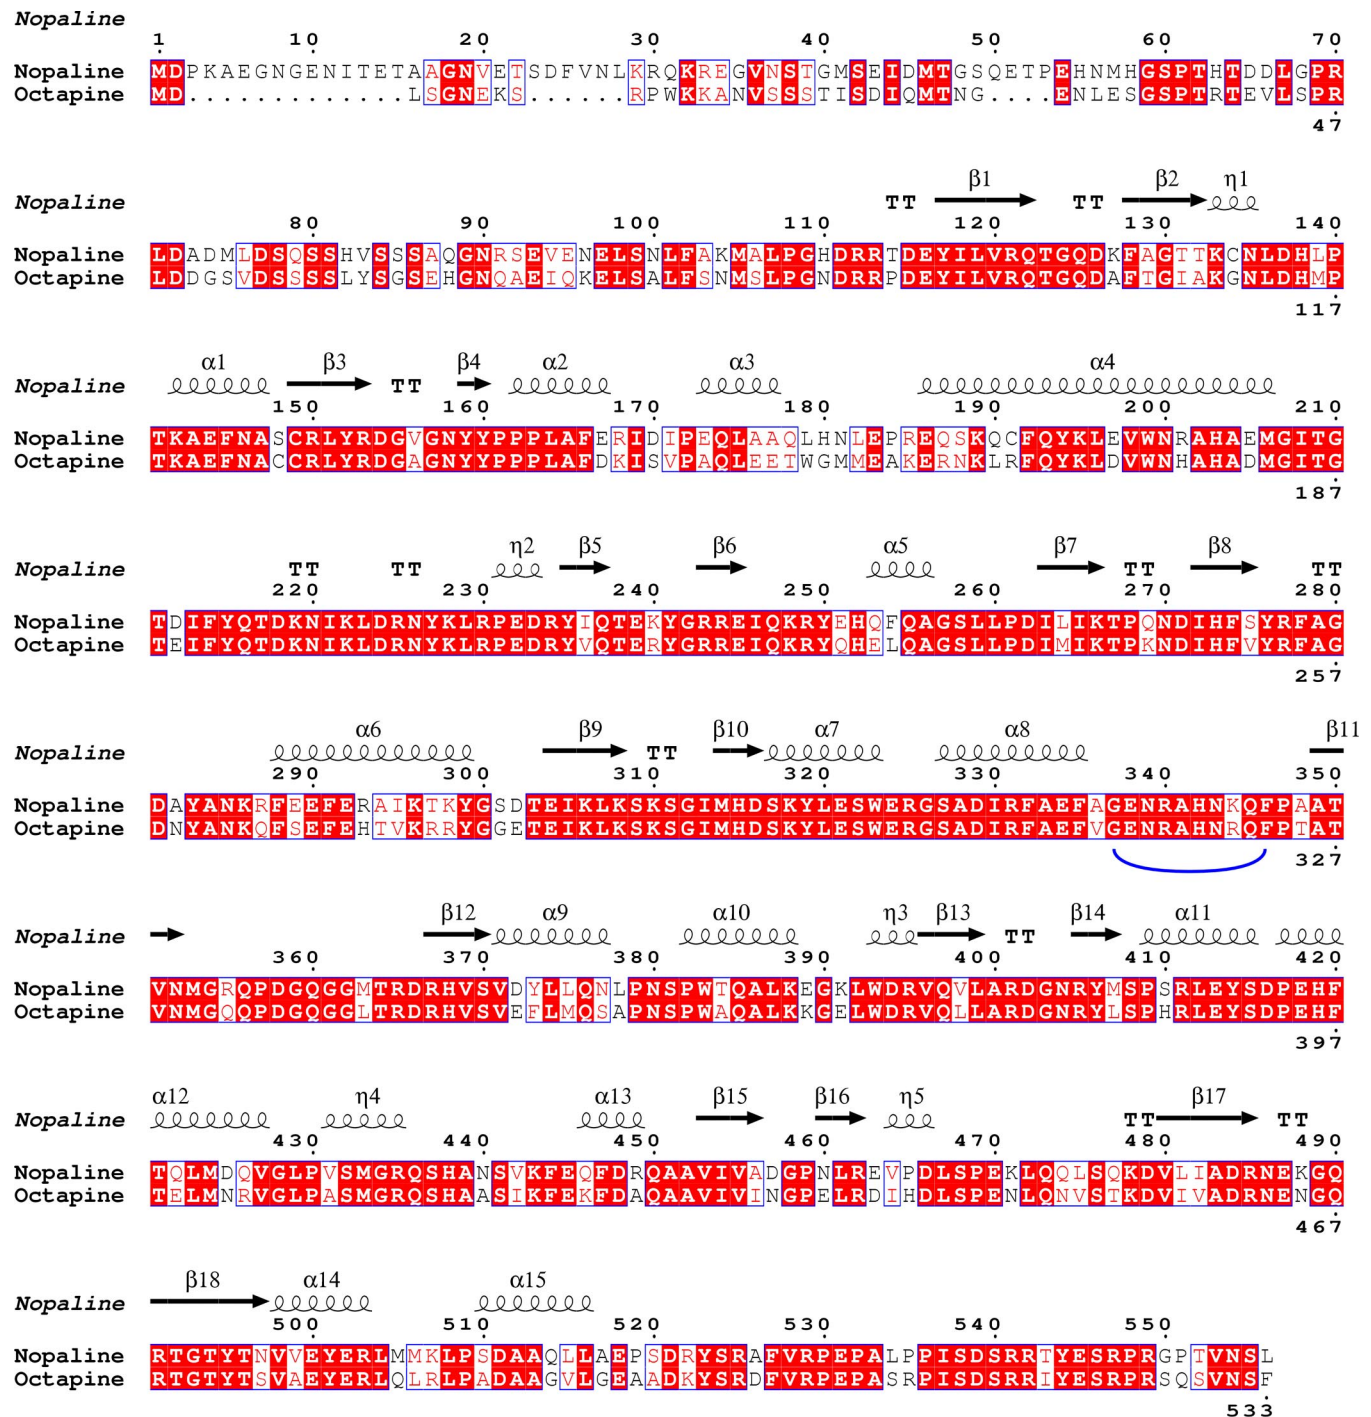

Fig. S1. Sequence and secondary structure alignment of VirE2. The sequence of nopaline VirE2 is compared with that of octapine VirE2 (numbering above sequence: nopaline; numbering below sequence: octapine). Secondary structure elements of VirE2 are labeled above the corresponding sequence;  $\alpha$ -helices are indicated by spirals and  $\beta$ -strands by arrows. Numbering of elements matches Fig. 1B in the main text. The residues conserved in both proteins appear in red blocks. The flexible linker between residues 337 and 346, connecting the two VirE2 domains, is marked with a blue brace. The figure was created by using ESPript (Gouet P, Courcelle E, Stuart DJ, Metz F (1999) ESPript: multiple sequence alignments in PostScript. *Bioinformatics*. 15:305–8).

**Table S1. Interacting residues between VirE1 and VirE2 (up to 3.5 Å)**

| VirE1   | VirE2 N-terminal domain | VirE2 C-terminal domain |
|---------|-------------------------|-------------------------|
| H31     | K248                    |                         |
| Q32     | E167                    |                         |
| N34     | K248                    |                         |
| G35     | Q247 S311               |                         |
| F36     | L164 Q247               |                         |
| D40     | S309 S311 H315          |                         |
| E42     | W323                    | K471                    |
| E45 L46 |                         | R367                    |
| E47     | R168 Y319               |                         |
| N48     | R168                    |                         |
| V50     |                         | L378                    |
| H52     | D170                    |                         |
| C53     |                         | M353 W383               |
| P54     |                         | Q356 W383               |
| L55     |                         | P382                    |

**Table S2. Data collection and refinement statistics**

| Data collection                                 |                                               |
|-------------------------------------------------|-----------------------------------------------|
| Resolution range, Å*                            | 50.0–2.3 (2.38–2.3)                           |
| λ, Å                                            | 0.979                                         |
| Space group                                     | P2 <sub>1</sub> 2 <sub>1</sub> 2 <sub>1</sub> |
| Unit cell dimensions:                           |                                               |
| a, Å                                            | 51.02                                         |
| b, Å                                            | 96.27                                         |
| c, Å                                            | 112.48                                        |
| Number of molecules in the asymmetric unit      | 1                                             |
| Number of reflections measured                  | 179,275                                       |
| Number of unique reflections*                   | 25,250 (2,464)                                |
| $R_{\text{sym}}^{\dagger}$                      | 0.109 (0.386)                                 |
| Completeness, %*                                | 99.8 (99.9)                                   |
| Redundancy                                      | 7.1 (6.6)                                     |
| $\langle I \rangle / \langle \sigma(I) \rangle$ | 16.8 (4.6)                                    |
| Refinement statistics                           |                                               |
| Resolution limits, Å                            | 48.1–2.3                                      |
| $R_{\text{free}}$ , % <sup>‡</sup>              | 21.0                                          |
| $R_{\text{work}}$ , % <sup>‡</sup>              | 25.3                                          |
| Mean B factor, Å <sup>2</sup>                   | 32.38                                         |
| Rms deviations                                  |                                               |
| Bond lengths, Å                                 | 0.025                                         |
| Bond angles, °                                  | 2.16                                          |
| Torsion angles, °                               | 9.29                                          |
| Ramachandran plot                               |                                               |
| Most favored, %                                 | 90.5                                          |
| Additional allowed, %                           | 8.9                                           |
| Generously allowed, %                           | 0.3                                           |
| Disallowed regions, %                           | 0.3                                           |

\* Values in parentheses are for the highest-resolution shells.

<sup>†</sup> $R_{\text{sym}} = \sum (|I_{hkl}| - \langle I_{hkl} \rangle) / \sum |I_{hkl}|$ , where  $\langle I_{hkl} \rangle$  is the average intensity over symmetry-related reflections and  $I_{hkl}$  is the observed intensity.

<sup>‡</sup> $R = \sum |F_o| - \sum |F_c| / \sum |F_o|$ , where  $F_o$  denotes the observed structure factor amplitude and  $F_c$  the structure factor calculated from the model.
